# Supplementary material for: HPLC-PDA Method for Quantification of Bioactive Compounds in Crude Extract and Fractions of Aucklandia costus Falc. and Cytotoxicity Studies against Cancer Cells
Source: MDPI journal article supplement (doi:10.3390/molecules28124815), 2023-06-16
Supplement: s1 [file s1]

## Table of contents

- Fig S1:  $^1\text{H}$  NMR spectra of compound Dehydrocostus lactone.  
Fig S2:  $^{13}\text{C}$  NMR spectra of compound Dehydrocostus lactone  
Fig S3: DEPT spectra of compound Dehydrocostus lactone.  
Fig S4: Purity profile of compound Dehydrocostus lactone.  
Fig S5: HRMS of compound Dehydrocostus lactone  
Fig S6:  $^1\text{H}$  NMR spectra of compound Costunolide.  
Fig S7:  $^{13}\text{C}$  NMR spectra of compound Costunolide.  
Fig S8: DEPT spectra of compound Costunolide.  
Fig S9: Purity profile of compound Costunolide.  
Fig S10: HRMS of compound Dehydrocostus lactone  
Fig S11:  $^1\text{H}$  NMR spectra of compound Syringin.  
Fig S12:  $^{13}\text{C}$  NMR spectra of compound Syringin.  
Fig S13: DEPT spectra of compound Syringin.  
Fig S14: Purity profile of compound Syringin.  
Fig S15: HRMS of compound Syringin.  
Fig S16:  $^1\text{H}$  NMR spectra of compound 5-Hydroxymethyl-2-furaldehyde  
Fig S17:  $^{13}\text{C}$  NMR spectra of compound 5-Hydroxymethyl-2-furaldehyde.  
Fig S18: DEPT spectra of compound 5-Hydroxymethyl-2-furaldehyde.  
Fig S19: Purity profile of compound 5-Hydroxymethyl-2-furaldehyde.  
Fig S20: HRMS of compound 5-Hydroxymethyl-2-furaldehyde.  
Fig S21: Calibration plot of compound Dehydrocostus lactone.  
Fig S22: Calibration plot of compound Costunolide.  
Fig S23: Calibration plot of compound Syringin.  
Fig S24: Calibration plot of compound 5-Hydroxymethyl-2-furaldehyde.  
Fig S25: HPLC Chromatogram of Hexane fraction.  
Fig S26: HPLC Chromatogram of Chloroform fraction.  
Fig S27: HPLC Chromatogram of Butanol fraction.

### Compound 1: Dehydrocostus lactone

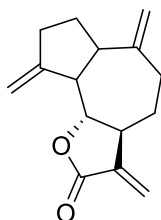

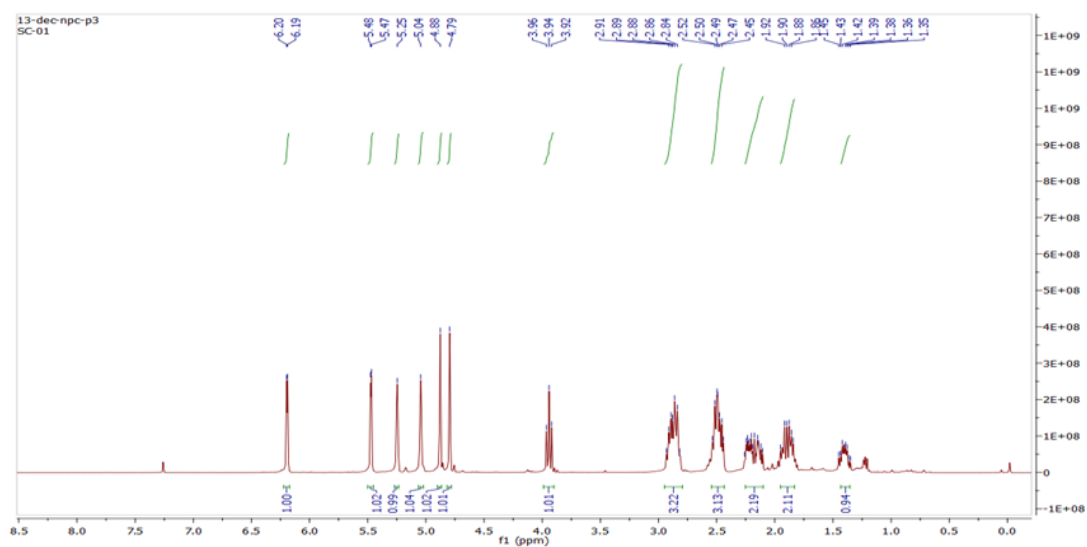

**Figure S1:**  $^1\text{H}$  NMR spectra of Dehydrocostus lactone ( $\text{CDCl}_3$ , 400 MHz).

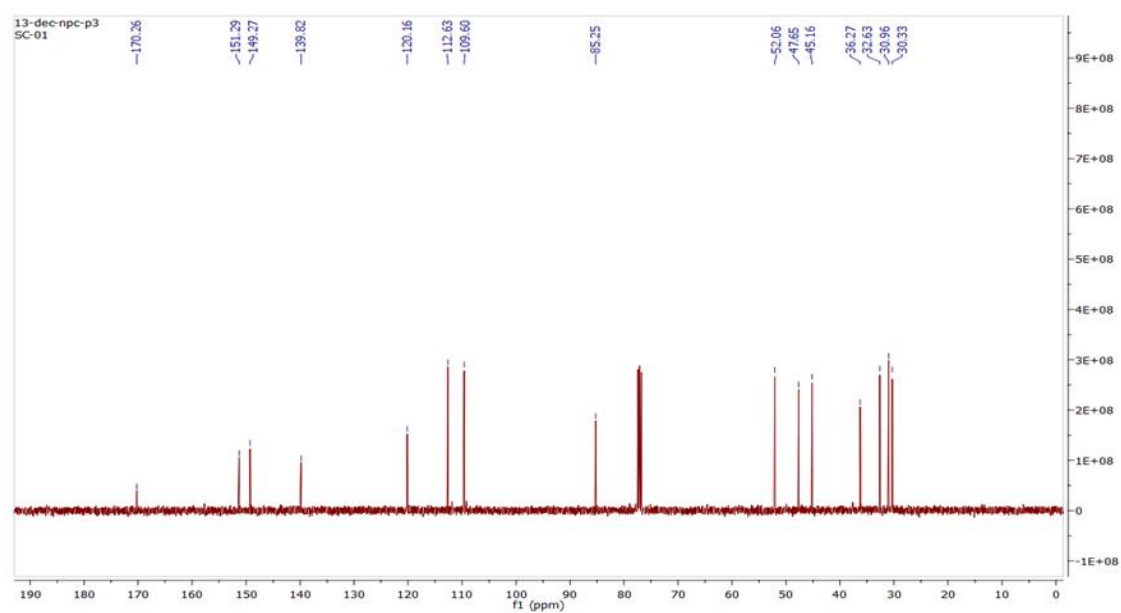

**Figure S2:**  $^{13}\text{C}$  NMR spectra of Dehydrocostus lactone ( $\text{CDCl}_3$ , 100 MHz).

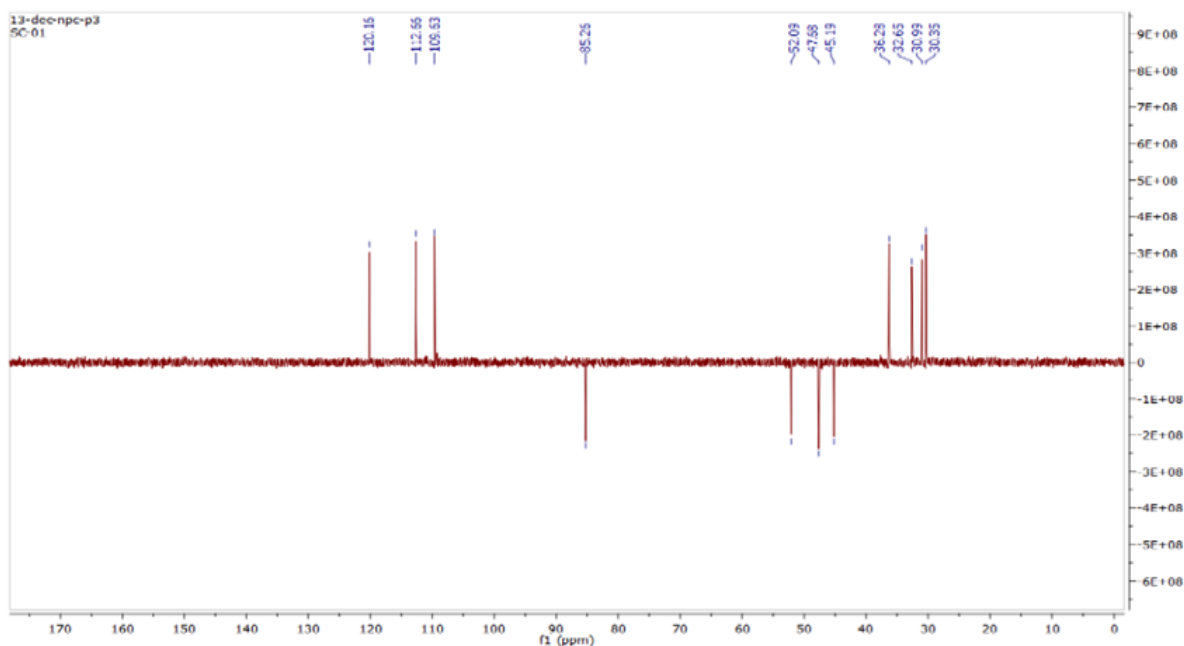

**Figure S3:** DEPT spectra of Dehydrocostus lactone ( $\text{CDCl}_3$ , 400 MHz).

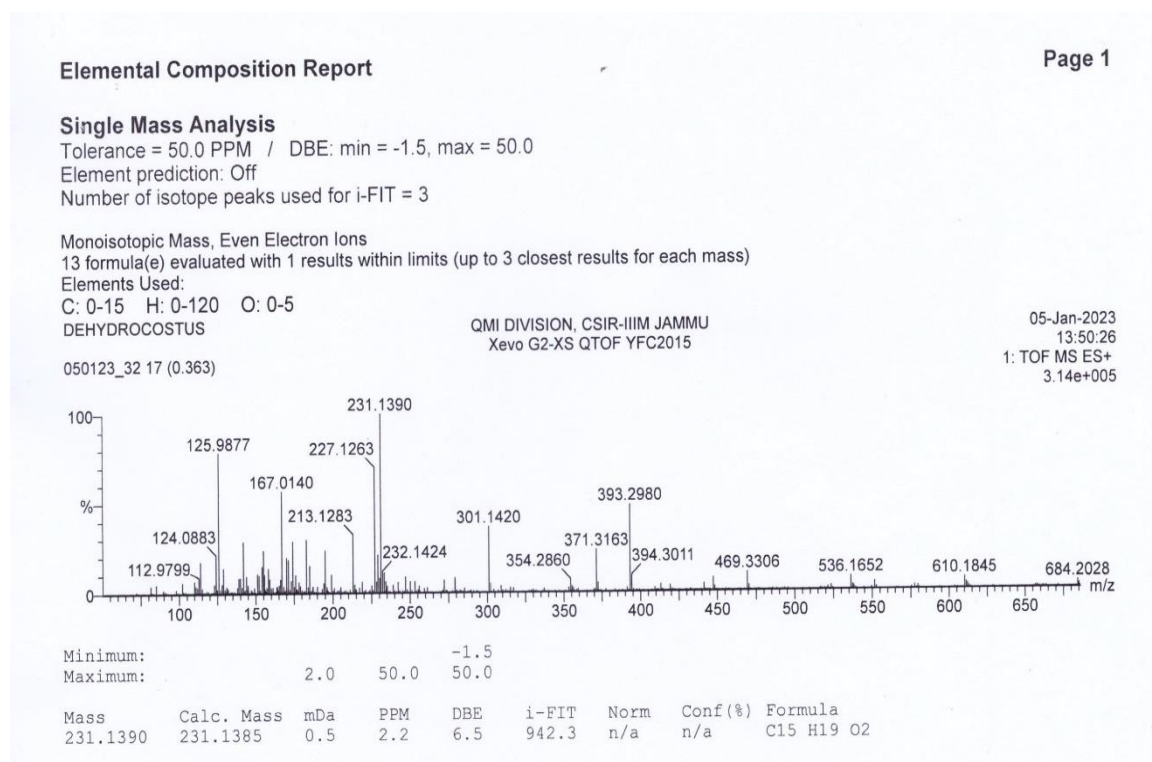

**Figure S4:** HRMS of Dehydrocostus lactone ( $\text{CDCl}_3$ , 400 MHz).

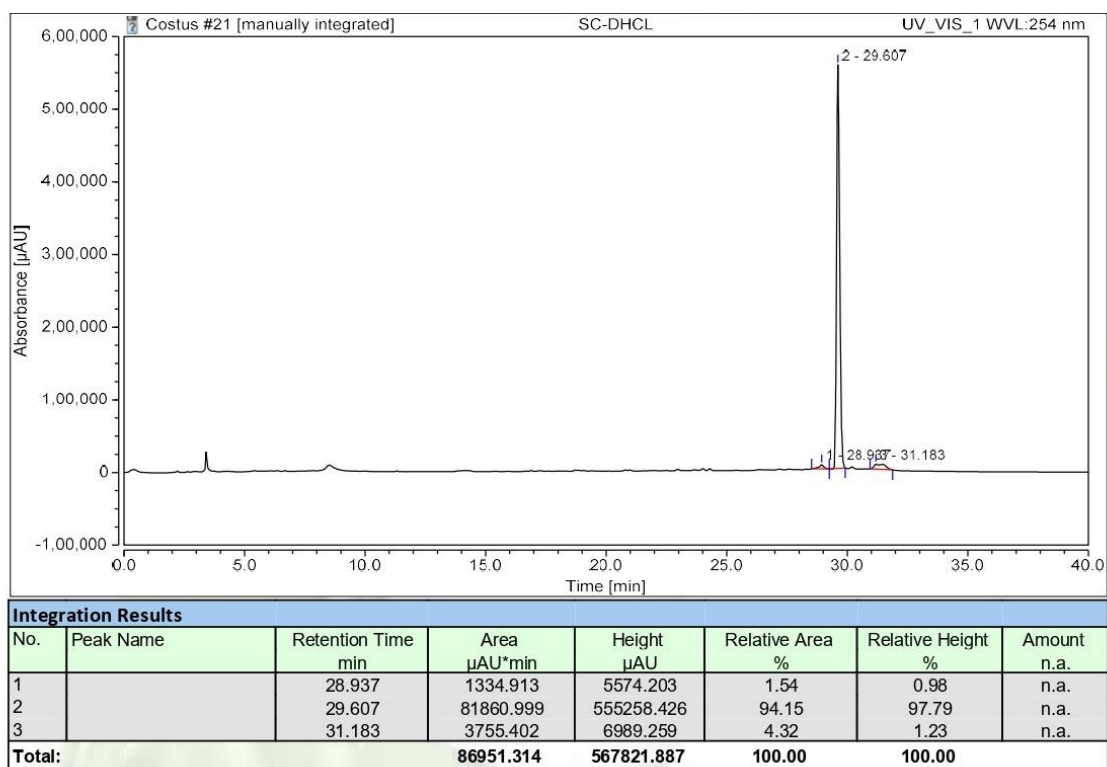

**Fig S5:** Purity profile of compound Dehydrocostus lactone.

Compound 2: Costunolide

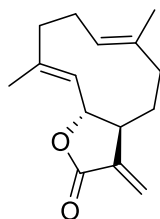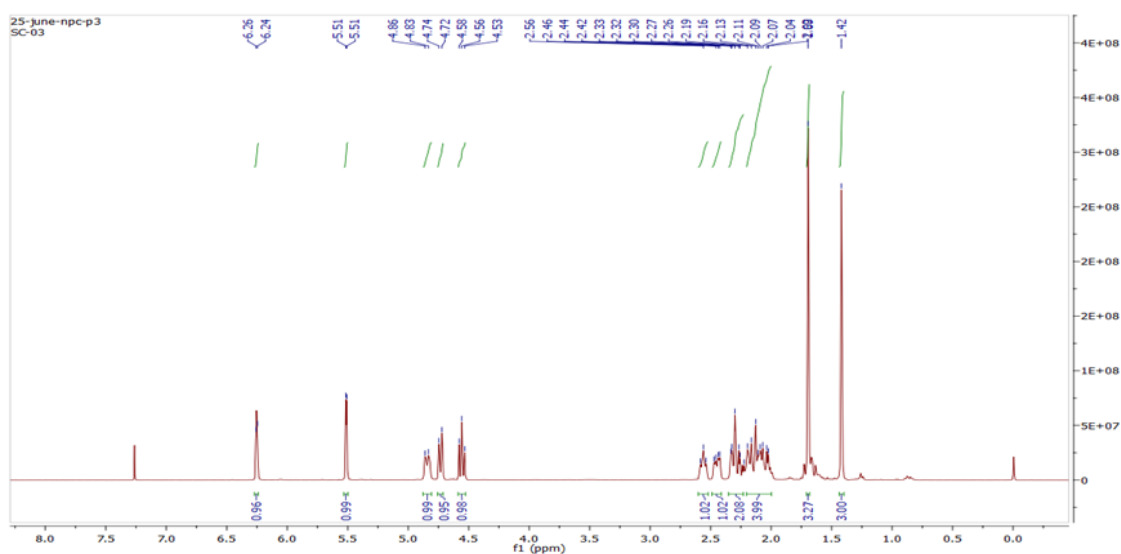

**Figure S6:**  $^1\text{H}$  NMR spectra of Costunolide ( $\text{CDCl}_3$ , 400 MHz).

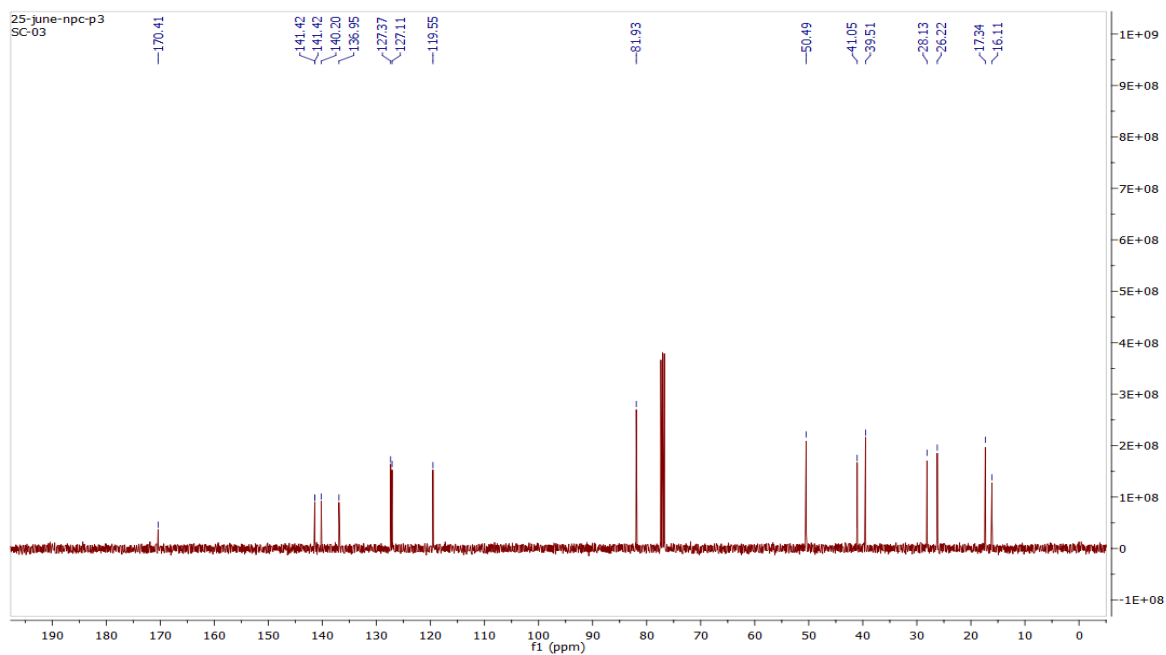

**Figure S7:**  $^{13}\text{C}$  NMR spectra of Costunolide ( $\text{CDCl}_3$ , 100 MHz).

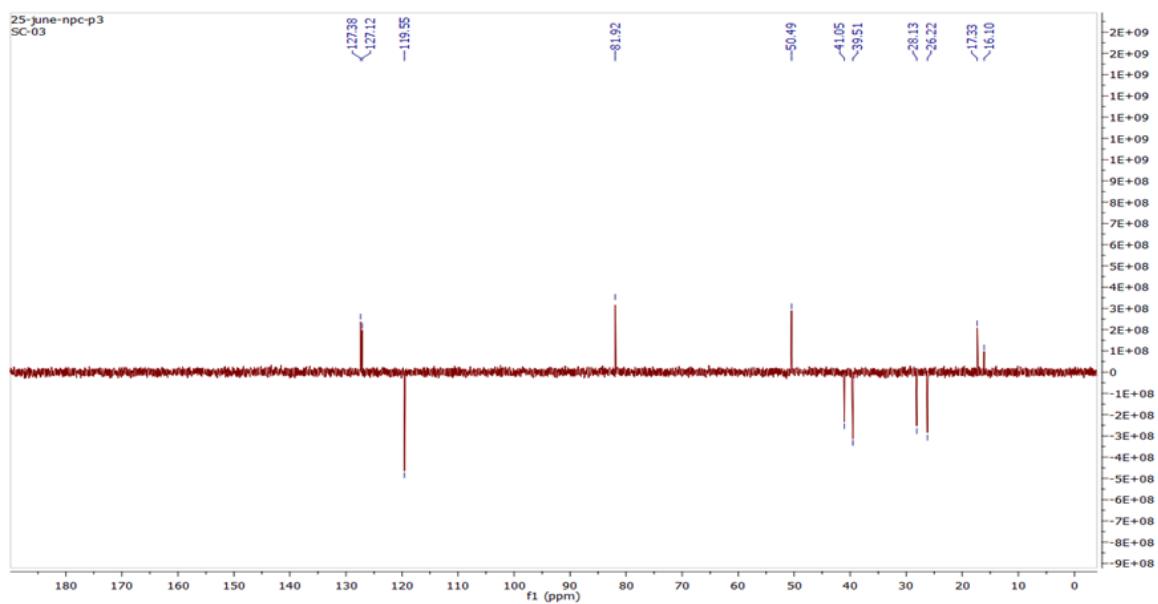

**Figure S8:** DEPT spectra of Costunolide ( $\text{CDCl}_3$ , 400 MHz).

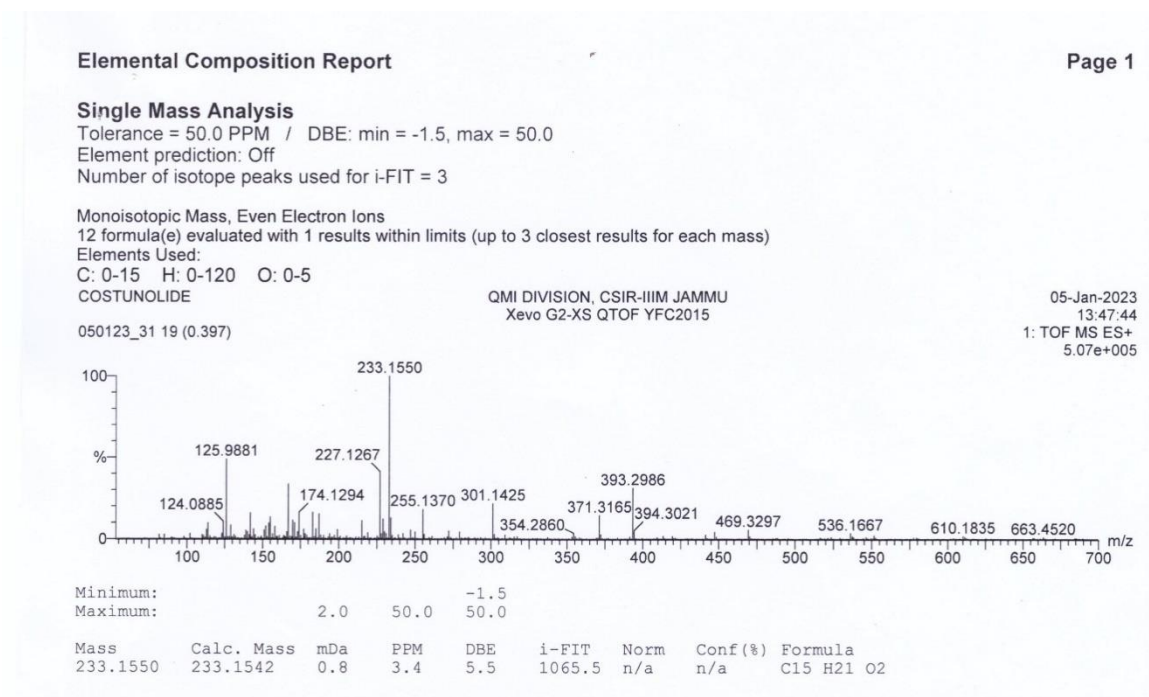

**Figure S9:** HRMS of Costunolide (CDCl<sub>3</sub>, 400 MHz).

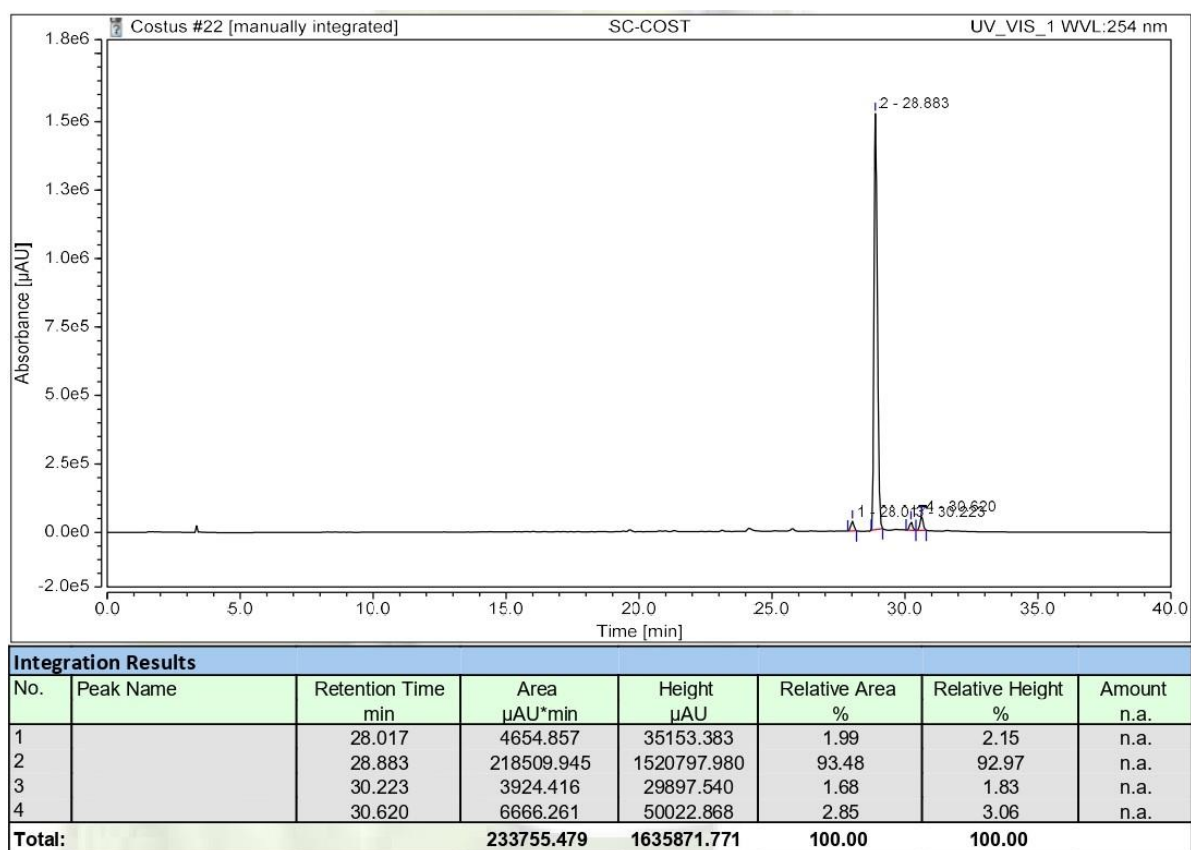

**Fig S10:** Purity profile of compound Costunolide.

### Compound 3: Syringin

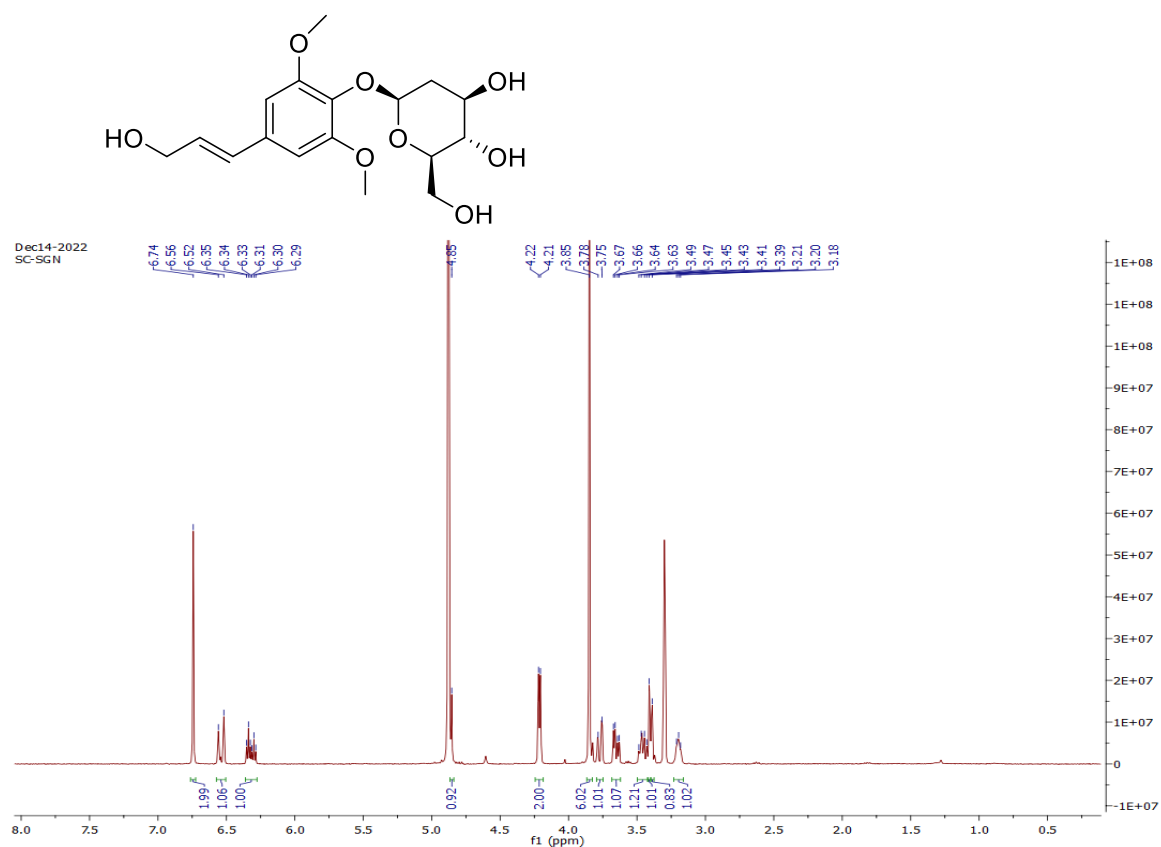

**Figure S11:** <sup>1</sup>H NMR spectra of Syringin (CDCl<sub>3</sub>, 400 MHz).

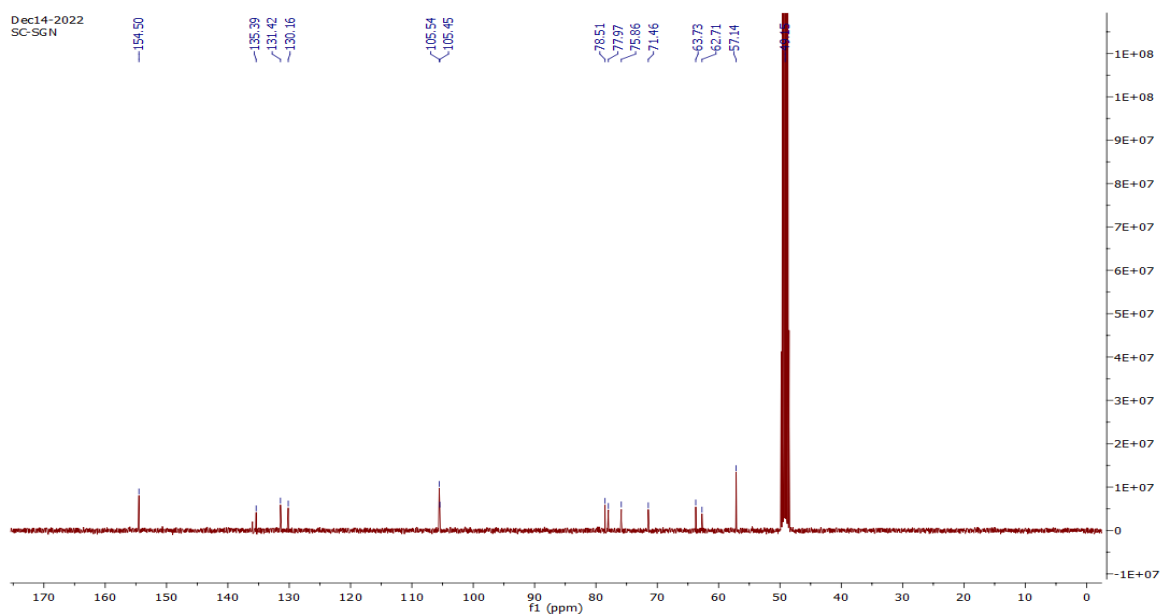

**Figure S12:** <sup>13</sup>C NMR spectra of Syringin (CD<sub>3</sub>OD, 100 MHz).

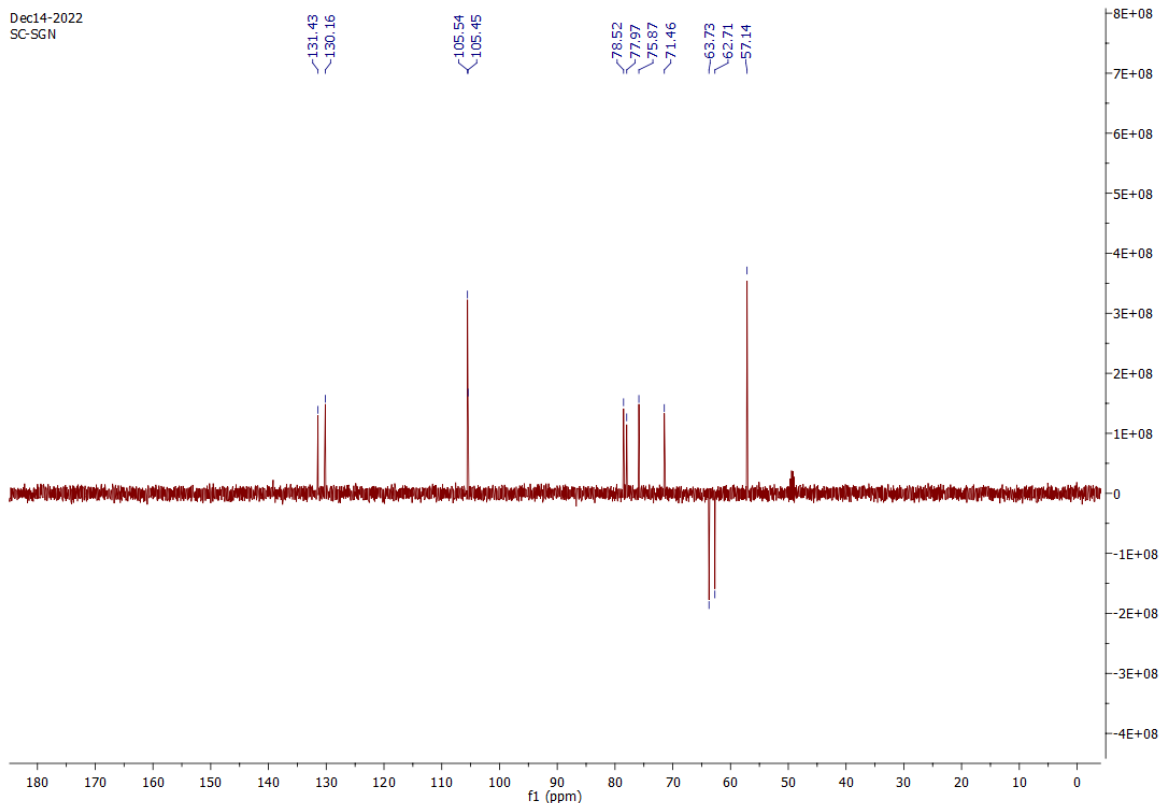

**Figure S13:** DEPT spectra of Syringin (CD<sub>3</sub>OD, 400 MHz).

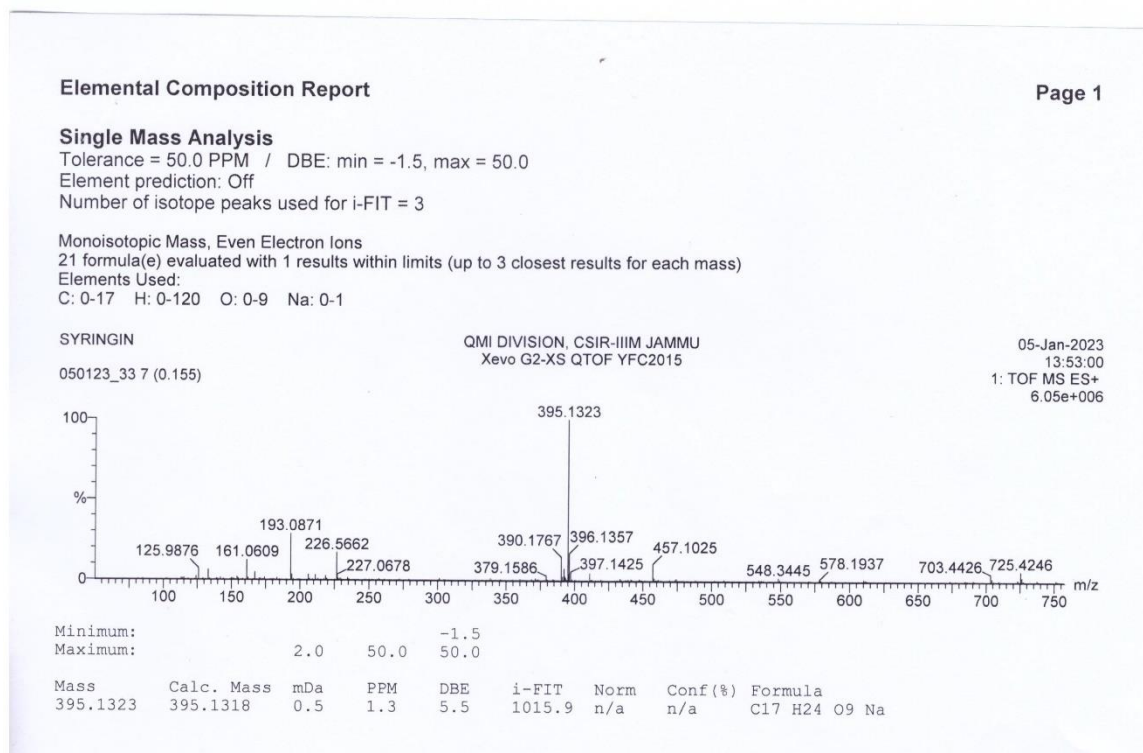

**Figure S14:** HRMS of Syringin (CD<sub>3</sub>OD, 400 MHz).

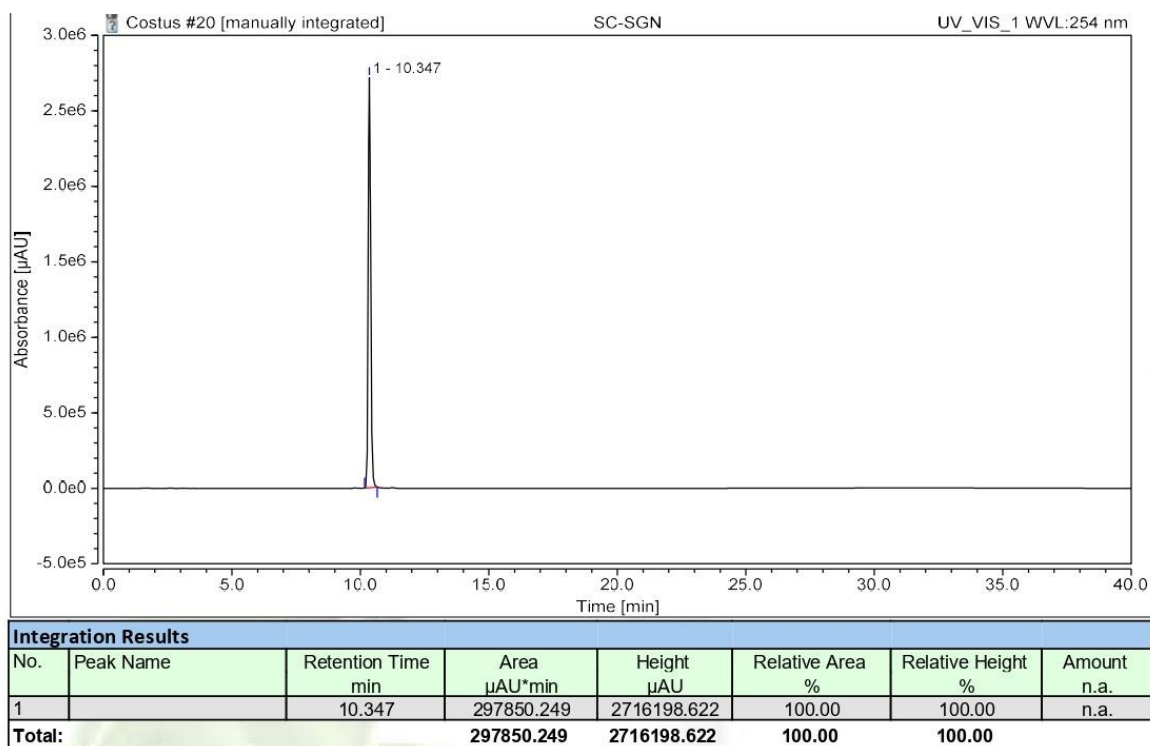

**Fig S15:** Purity profile of compound Syringin.

**Compound 4:** 5-Hydroxymethyl-2-furaldehyde

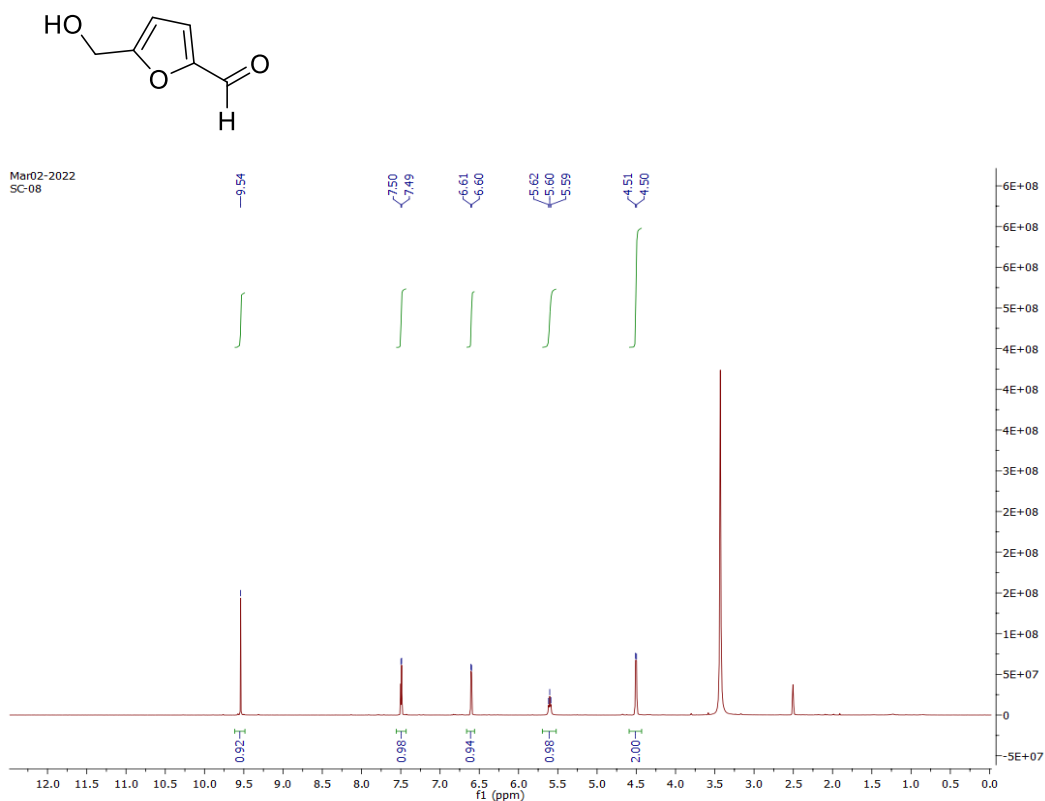

**Figure S16:**  $^1\text{H}$  NMR spectra of 5-Hydroxymethyl-2-furaldehyde (DMSO  $\text{d}_6$ , 400 MHz).

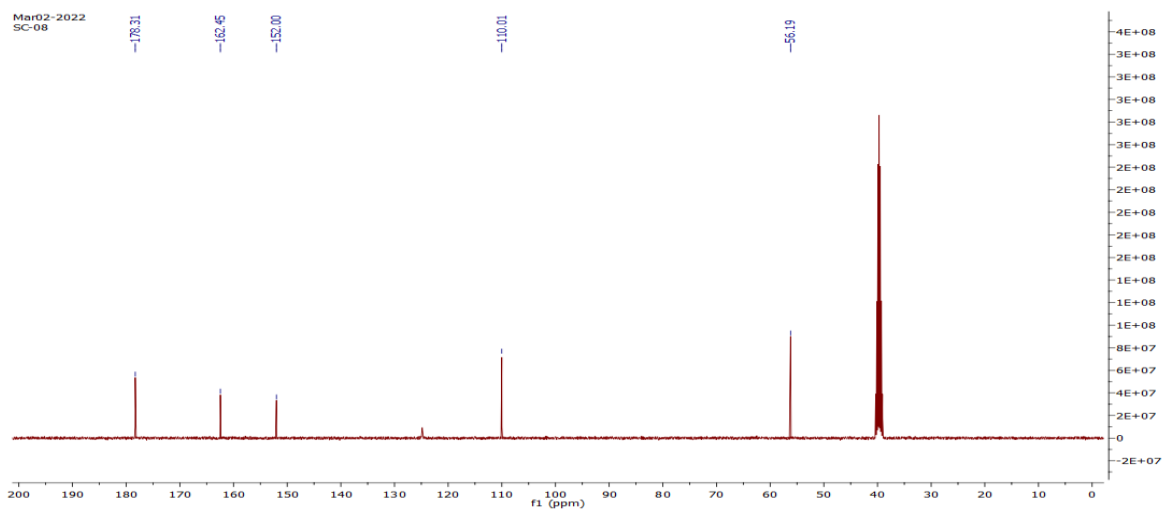

**Figure S17:**  $^{13}\text{C}$  NMR spectra of 5-Hydroxymethyl-2-furaldehyde (DMSO  $\text{d}_6$ , 100 MHz).

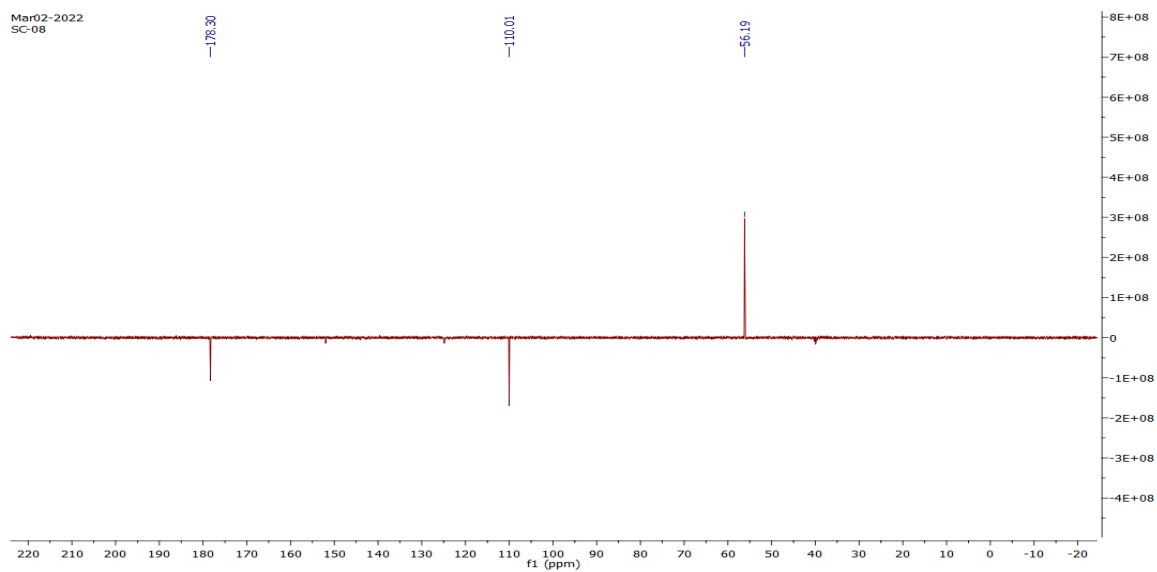

**Figure S18:** DEPT spectra of 5-Hydroxymethyl-2-furaldehyde (DMSO  $\text{d}_6$ , 400 MHz).

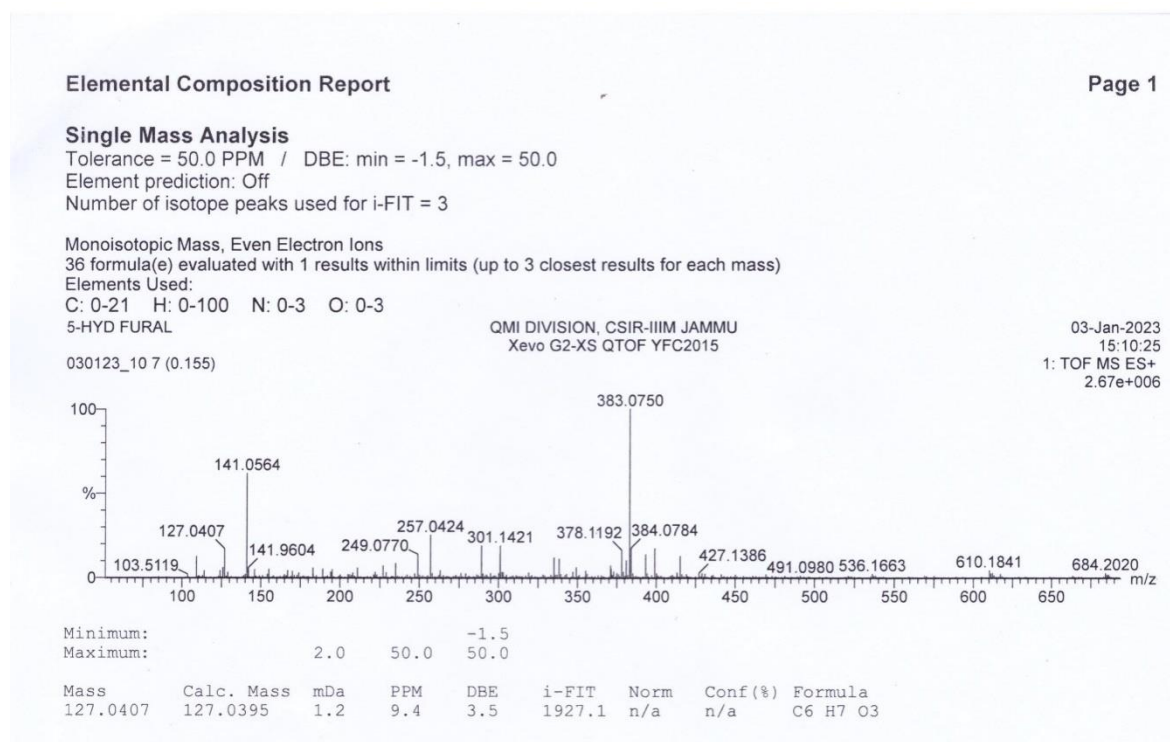

**Figure S19:** HRMS of 5-Hydroxymethyl-2-furaldehyde.

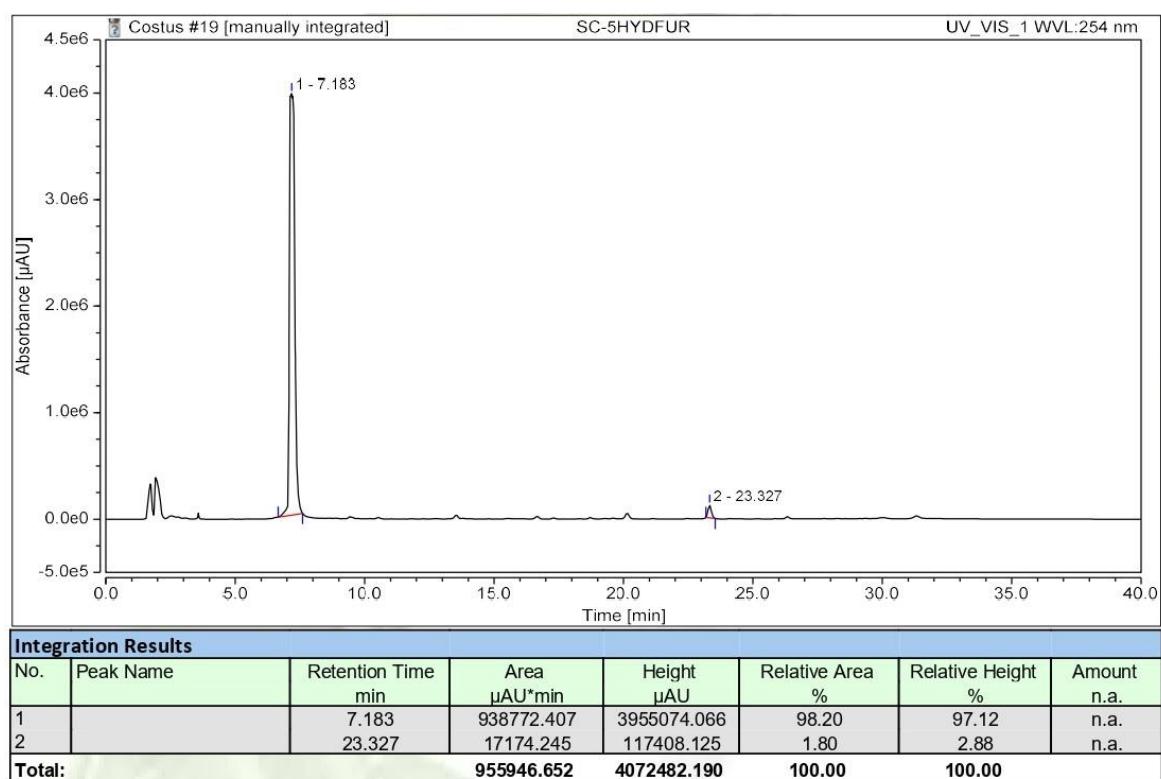

**Fig S20:** Purity profile of compound 5-Hydroxymethyl-2-furaldehyde.

## CALIBRATION PLOTS

Number of disabled Calibration Points 0

R-Square

0.9998

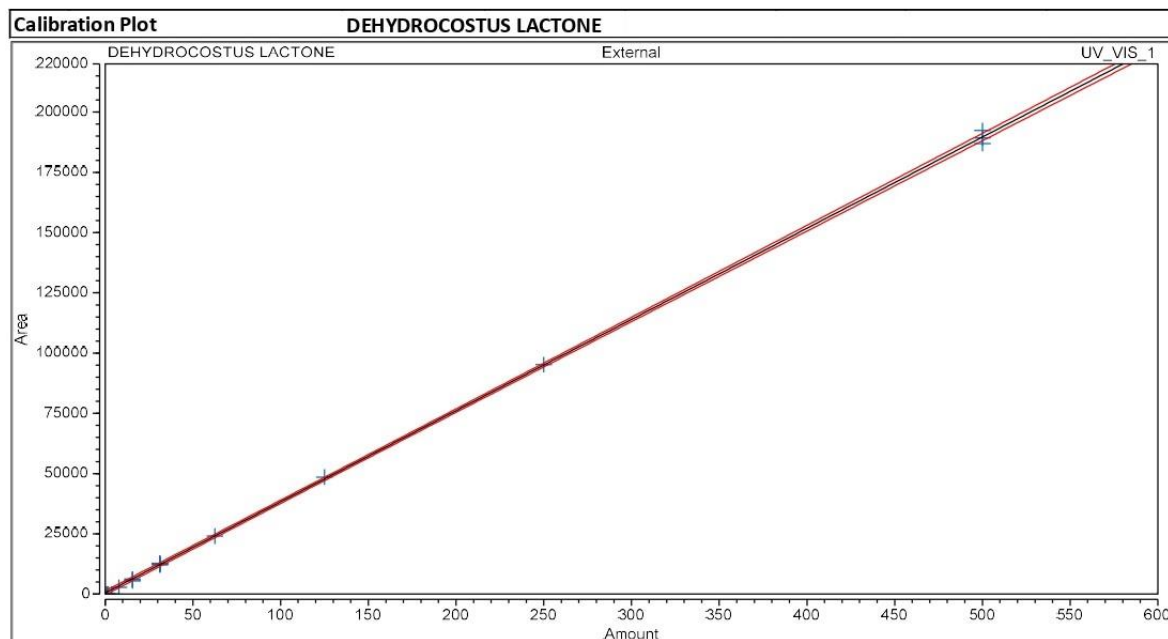

**Fig S21:** Calibration plot of compound Dehydrocostus lactone.

Number of disabled Calibration Points 0

R-Square

0.9999

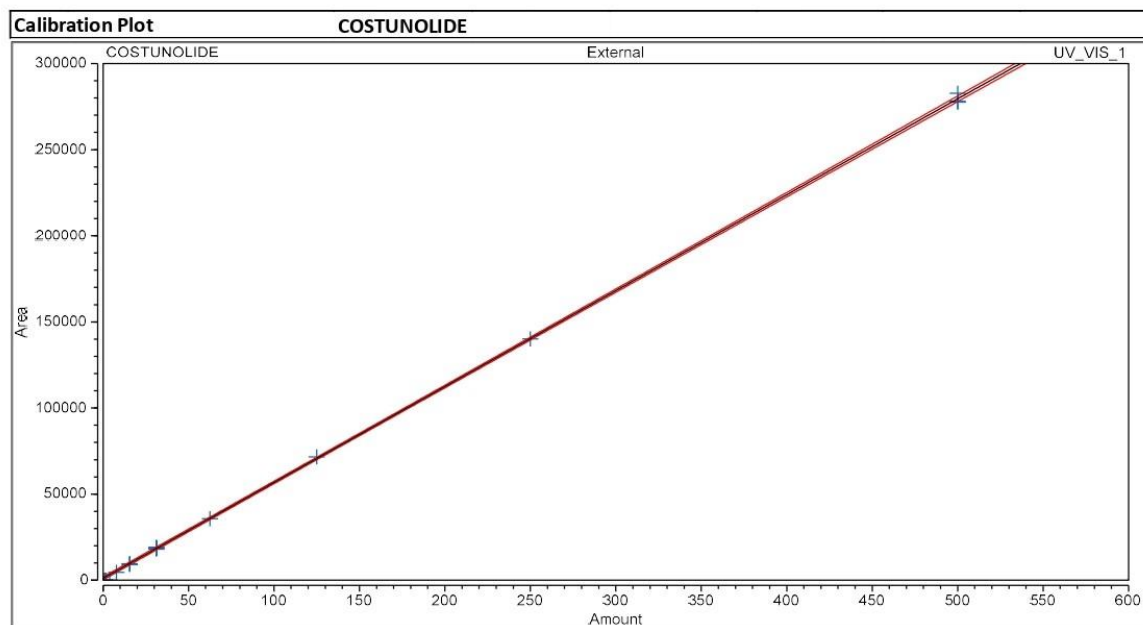

**Fig S22:** Calibration plot of compound Costunolide.

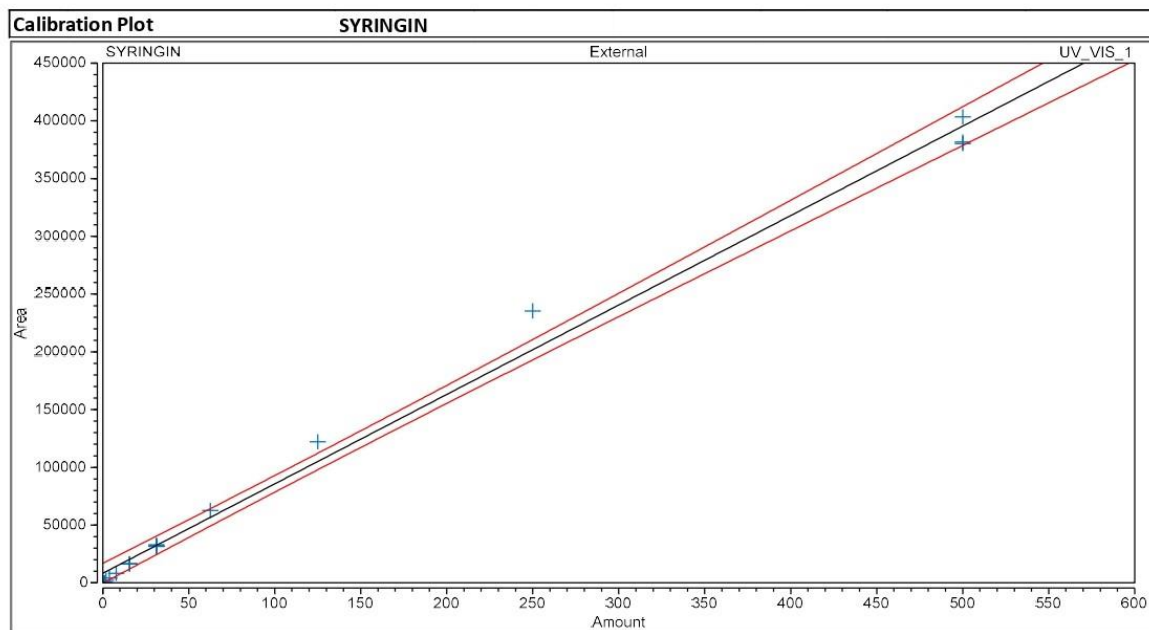

**Fig S23:** Calibration plot of compound Syringin.

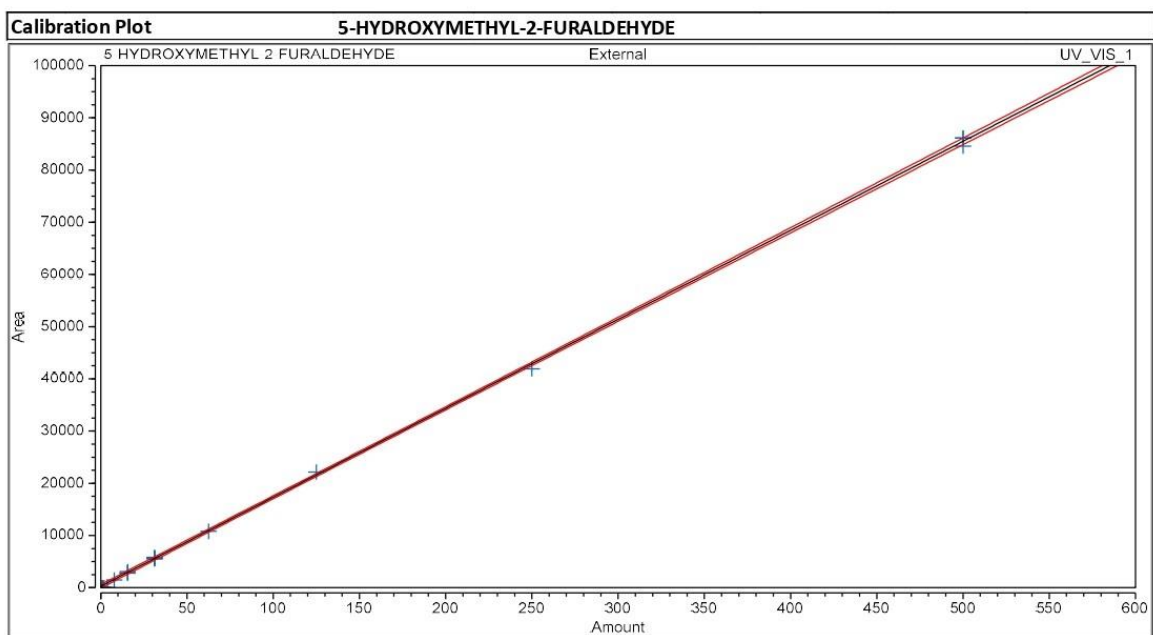

**Fig S24:** Calibration plot of compound 5-Hydroxymethyl-2-furaldehyde.

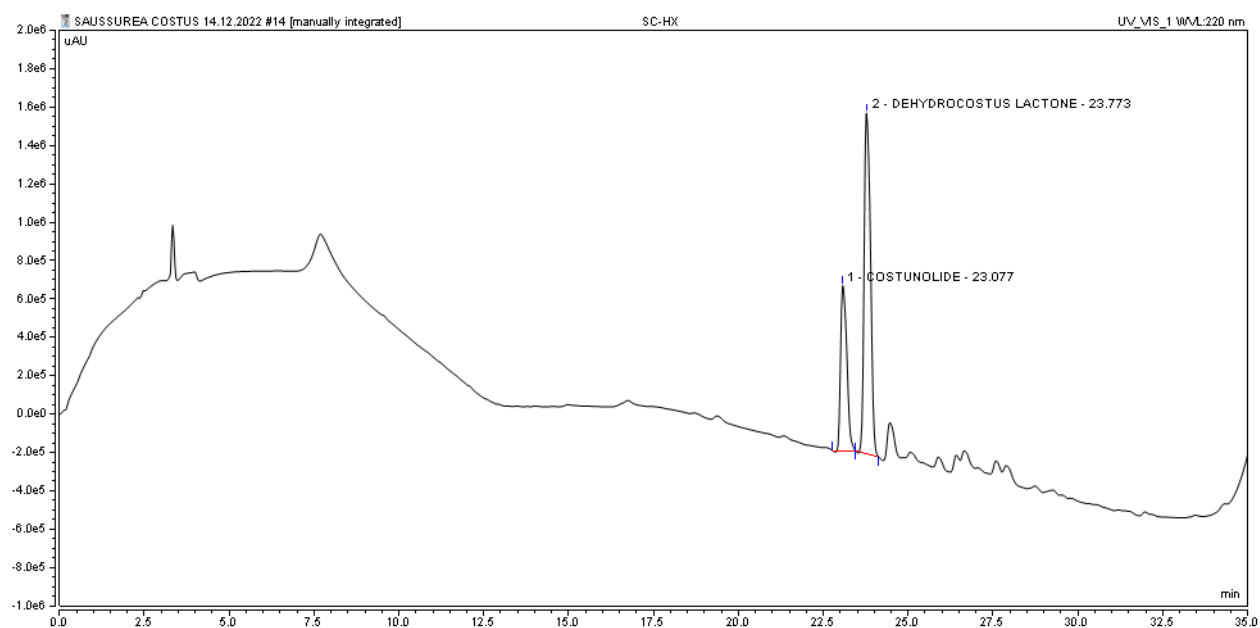

**Fig S25:** HPLC Chromatogram of Hexane fraction.

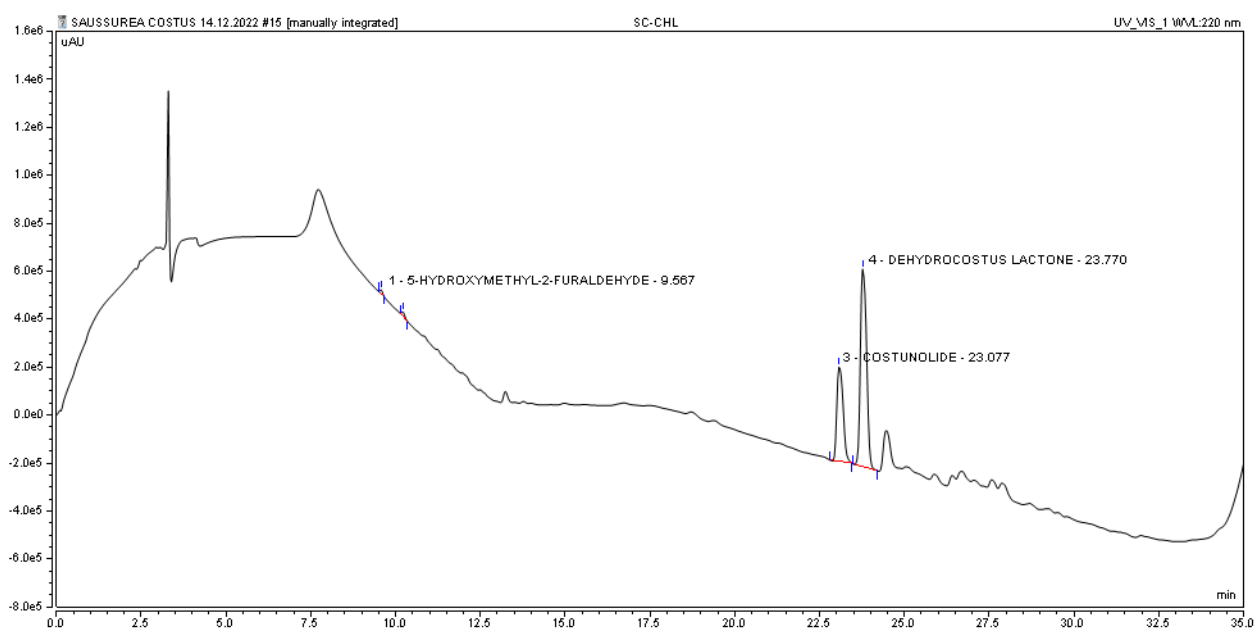

**Fig S26:** HPLC Chromatogram of Chloroform fraction.

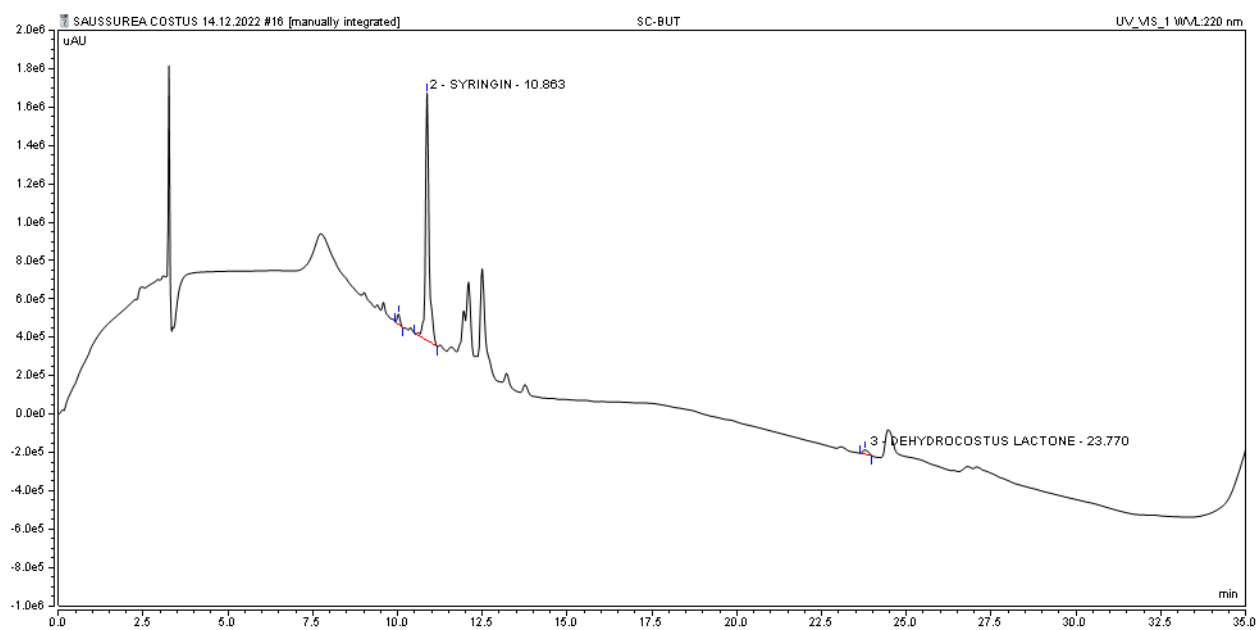

**Fig S27:** HPLC Chromatogram of Butanol fraction.
